# Supplementary material for: Racial and Ethnic Disparities in Management and Outcomes of Cardiac Arrest Complicating Acute Myocardial Infarction
Source: PubMed Central journal article supplement — J Am Heart Assoc. 2021 May 20;10(11):e019907. doi: 10.1161/JAHA.120.019907 (PMC8483555; doi:10.1161/jaha.120.019907), 2021-05-20
Supplement: JAH3-10-e019907-s001.pdf [file JAH3-10-e019907-s001.pdf]

# **SUPPLEMENTAL MATERIAL**

**Table S1. Administrative codes used for identification of diagnoses and procedures.**

| <b>Comorbidity</b>                 |                               | <b>International Classification of Diseases 9.0 Clinical Modification Codes</b>                                        |
|------------------------------------|-------------------------------|------------------------------------------------------------------------------------------------------------------------|
| Cardiac arrest                     | Cardiac arrest                | 427.5                                                                                                                  |
|                                    | Ventricular fibrillation      | 427.41                                                                                                                 |
|                                    | Cardiopulmonary Resuscitation | 99.60                                                                                                                  |
|                                    | Closed Chest Cardiac Massage  | 99.63                                                                                                                  |
| Coronary angiography               |                               | 37.22, 37.23, 88.53-88.56                                                                                              |
| Percutaneous coronary intervention |                               | 00.66, 36.01, 36.02, 36.05, 36.06, 36.07, 88.57                                                                        |
| Invasive hemodynamic assessment    |                               | 89.63, 89.64, 89.66, 89.67, 89.68                                                                                      |
| Mechanical circulatory support     |                               | 37.61, 37.68, 39.65                                                                                                    |
| Invasive mechanical ventilation    |                               | 96.7, 96.70, 96.71, 96.72                                                                                              |
| Hemodialysis                       |                               | 39.95                                                                                                                  |
| Hepatic failure                    |                               | 570.0, 572.2, 573.3, 573.4                                                                                             |
| Respiratory failure                |                               | 518.81, 518.82, 518.85, 786.09, 799.1, 96.7, 96.70, 96.71, 96.72                                                       |
| Renal failure                      |                               | 584, 584.5, 584.6, 584.7, 584.8, 584.9                                                                                 |
| Hematologic failure                |                               | 286.6-286.9, 287.4, 287.5                                                                                              |
| Neurological failure               |                               | 293, 293.0, 293.1, 293.8, 293.81-293.84, 293.89, 293.9, 348.1, 348.3, 348.30, 348.81,<br>348.39, 780.01, 780.09, 89.14 |

**Table S2. Univariate associations with in-hospital mortality in AMI-CA.**

| Total cohort<br>(N=182,750)                                         |                                         | Odds ratio         | 95% confidence interval |             | P      |
|---------------------------------------------------------------------|-----------------------------------------|--------------------|-------------------------|-------------|--------|
|                                                                     |                                         |                    | Lower Limit             | Upper Limit |        |
| <b>Race</b>                                                         | <b>White</b>                            | Reference category |                         |             |        |
|                                                                     | <b>Black</b>                            | 1.30               | 1.26                    | 1.34        | <0.001 |
|                                                                     | <b>Others*</b>                          | 1.30               | 1.27                    | 1.34        | <0.001 |
| <b>Age (years)</b>                                                  | <b>&lt;75 years</b>                     | Reference category |                         |             |        |
|                                                                     | <b>&gt;75 years</b>                     | 2.98               | 2.92                    | 3.05        | <0.001 |
| <b>Female sex</b>                                                   |                                         | 1.54               | 1.51                    | 1.57        | <0.001 |
| <b>Primary payer</b>                                                | <b>Medicare</b>                         | Reference category |                         |             |        |
|                                                                     | <b>Medicaid</b>                         | 0.49               | 0.48                    | 0.51        | <0.001 |
|                                                                     | <b>Private</b>                          | 0.33               | 0.33                    | 0.34        | <0.001 |
|                                                                     | <b>Others#</b>                          | 0.54               | 0.52                    | 0.56        | <0.001 |
| <b>Quartile of<br/>median household<br/>income for zip<br/>code</b> | <b>0-25<sup>th</sup></b>                | Reference category |                         |             |        |
|                                                                     | <b>26<sup>th</sup>-50<sup>th</sup></b>  | 0.86               | 0.83                    | 0.88        | <0.001 |
|                                                                     | <b>51<sup>st</sup>-75<sup>th</sup></b>  | 0.78               | 0.76                    | 0.80        | <0.001 |
|                                                                     | <b>75<sup>th</sup>-100<sup>th</sup></b> | 0.78               | 0.76                    | 0.80        | <0.001 |
| <b>Hospital teaching</b>                                            | <b>Rural</b>                            | Reference category |                         |             |        |

|                                             |                                 |                    |      |      |        |
|---------------------------------------------|---------------------------------|--------------------|------|------|--------|
| <b>status and location</b>                  | <b>Urban Non-Teaching</b>       | 0.87               | 0.83 | 0.91 | <0.001 |
|                                             | <b>Urban Teaching</b>           | 0.85               | 0.82 | 0.89 | <0.001 |
| <b>Hospital bed-size</b>                    | <b>Small</b>                    | Reference category |      |      |        |
|                                             | <b>Medium</b>                   | 1.01               | 0.97 | 1.04 | 0.67   |
|                                             | <b>Large</b>                    | 0.95               | 0.92 | 0.98 | <0.001 |
| <b>Hospital region</b>                      | <b>Northeast</b>                | Reference category |      |      |        |
|                                             | <b>Midwest</b>                  | 0.86               | 0.83 | 0.89 | <0.001 |
|                                             | <b>South</b>                    | 1.01               | 0.98 | 1.04 | 0.44   |
|                                             | <b>West</b>                     | 1.03               | 0.99 | 1.06 | 0.08   |
| <b>Charlson Comorbidity Index</b>           | <b>0-3</b>                      | Reference category |      |      |        |
|                                             | <b>4-6</b>                      | 2.09               | 2.04 | 2.13 | <0.001 |
|                                             | <b>≥ 7</b>                      | 3.49               | 3.40 | 3.59 | <0.001 |
| <b>Type of AMI</b>                          | <b>ST-segment elevation</b>     | Reference category |      |      |        |
|                                             | <b>Non-ST-segment elevation</b> | 1.53               | 1.51 | 1.56 | <0.001 |
| <b>Multi-organ failure</b>                  |                                 | 2.57               | 2.52 | 2.62 | <0.001 |
| <b>Cardiogenic shock</b>                    |                                 | 1.89               | 1.85 | 1.92 | <0.001 |
| <b>Atrial fibrillation/flutter</b>          |                                 | 1.15               | 1.13 | 1.18 | <0.001 |
| <b>Ventricular tachycardia/fibrillation</b> |                                 | 0.24               | 0.24 | 0.25 | <0.001 |

|                                           |      |      |      |        |
|-------------------------------------------|------|------|------|--------|
| <b>Coronary angiography</b>               | 0.20 | 0.20 | 0.21 | <0.001 |
| <b>Percutaneous coronary intervention</b> | 0.26 | 0.26 | 0.27 | <0.001 |
| <b>Coronary artery bypass grafting</b>    | 0.40 | 0.39 | 0.41 | <0.001 |
| <b>Pulmonary artery catheterization</b>   | 1.07 | 1.01 | 1.13 | 0.03   |
| <b>Mechanical circulatory support</b>     | 1.19 | 1.17 | 1.22 | <0.001 |
| <b>Invasive mechanical ventilation</b>    | 2.23 | 2.19 | 2.27 | <0.001 |
| <b>Acute hemodialysis</b>                 | 2.08 | 1.93 | 2.24 | <0.001 |

\*Hispanic, Asian or Pacific Islander, Native American, Others; #Self-Pay, No Charge, Others

AMI: acute myocardial infarction; CA: cardiac arrest

**Table S3. Multivariable regression for in-hospital mortality in AMI-CA.**

| Total cohort<br>(N=182,750)                                         |                                         | Odds ratio         | 95% confidence interval |             | <i>P</i> |
|---------------------------------------------------------------------|-----------------------------------------|--------------------|-------------------------|-------------|----------|
|                                                                     |                                         |                    | Lower Limit             | Upper Limit |          |
| <b>Race</b>                                                         | <b>White</b>                            | Reference category |                         |             |          |
|                                                                     | <b>Black</b>                            | 0.95               | 0.91                    | 0.99        | 0.007    |
|                                                                     | <b>Others*</b>                          | 1.11               | 1.08                    | 1.15        | <0.001   |
| <b>Age (years)</b>                                                  | <b>&lt;75 years</b>                     | Reference category |                         |             |          |
|                                                                     | <b>&gt;75 years</b>                     | 1.73               | 1.68                    | 1.79        | <0.001   |
| <b>Female sex</b>                                                   |                                         | 1.13               | 1.10                    | 1.16        | <0.001   |
| <b>Primary payer</b>                                                | <b>Medicare</b>                         | Reference category |                         |             |          |
|                                                                     | <b>Medicaid</b>                         | 0.67               | 0.65                    | 0.70        | <0.001   |
|                                                                     | <b>Private</b>                          | 0.60               | 0.58                    | 0.62        |          |
|                                                                     | <b>Others#</b>                          | 0.92               | 0.88                    | 0.96        | <0.001   |
| <b>Quartile of<br/>median household<br/>income for zip<br/>code</b> | <b>0-25<sup>th</sup></b>                | Reference category |                         |             |          |
|                                                                     | <b>26<sup>th</sup>-50<sup>th</sup></b>  | 0.92               | 0.89                    | 0.95        | <0.001   |
|                                                                     | <b>51<sup>st</sup>-75<sup>th</sup></b>  | 0.85               | 0.83                    | 0.88        | 0.78     |
|                                                                     | <b>75<sup>th</sup>-100<sup>th</sup></b> | 0.83               | 0.80                    | 0.85        | 0.74     |
| <b>Hospital teaching</b>                                            | <b>Rural</b>                            | Reference category |                         |             |          |

|                                             |                                 |                    |      |      |        |
|---------------------------------------------|---------------------------------|--------------------|------|------|--------|
| <b>status and location</b>                  | <b>Urban Non-Teaching</b>       | 1.04               | 0.99 | 1.10 | 0.13   |
|                                             | <b>Urban Teaching</b>           | 1.16               | 1.10 | 1.22 | <0.001 |
| <b>Hospital bed-size</b>                    | <b>Small</b>                    | Reference category |      |      |        |
|                                             | <b>Medium</b>                   | 1.15               | 1.10 | 1.19 | <0.001 |
|                                             | <b>Large</b>                    | 1.15               | 1.11 | 1.20 | <0.001 |
| <b>Hospital region</b>                      | <b>Northeast</b>                | Reference category |      |      |        |
|                                             | <b>Midwest</b>                  | 1.05               | 1.01 | 1.09 | 0.02   |
|                                             | <b>South</b>                    | 1.11               | 1.08 | 1.15 | <0.001 |
|                                             | <b>West</b>                     | 1.14               | 1.10 | 1.19 | <0.001 |
| <b>Charlson Comorbidity Index</b>           | <b>0-3</b>                      | Reference category |      |      |        |
|                                             | <b>4-6</b>                      | 1.20               | 1.17 | 1.24 | <0.001 |
|                                             | <b>≥ 7</b>                      | 1.42               | 1.37 | 1.47 | <0.001 |
| <b>Type of AMI</b>                          | <b>ST-segment elevation</b>     | Reference category |      |      |        |
|                                             | <b>Non-ST-segment elevation</b> | 0.77               | 0.75 | 0.79 | <0.001 |
| <b>Multi-organ failure</b>                  |                                 | 1.51               | 1.47 | 1.56 | <0.001 |
| <b>Cardiogenic shock</b>                    |                                 | 1.63               | 1.58 | 1.68 | <0.001 |
| <b>Atrial fibrillation/flutter</b>          |                                 | 0.82               | 0.80 | 0.84 | <0.001 |
| <b>Ventricular tachycardia/fibrillation</b> |                                 | 0.36               | 0.35 | 0.36 | <0.001 |

|                                           |      |      |      |        |
|-------------------------------------------|------|------|------|--------|
| <b>Coronary angiography</b>               | 0.42 | 0.41 | 0.44 | <0.001 |
| <b>Percutaneous coronary intervention</b> | 0.37 | 0.36 | 0.38 | <0.001 |
| <b>Coronary artery bypass grafting</b>    | 0.23 | 0.22 | 0.24 | <0.001 |
| <b>Pulmonary artery catheterization</b>   | 0.97 | 0.91 | 1.04 | 0.41   |
| <b>Mechanical circulatory support</b>     | 1.79 | 1.74 | 1.84 | <0.001 |
| <b>Invasive mechanical ventilation</b>    | 1.37 | 1.34 | 1.41 | <0.001 |
| <b>Acute hemodialysis</b>                 | 1.13 | 1.03 | 1.23 | 0.01   |

\*Hispanic, Asian or Pacific Islander, Native American, Others; #Self-Pay, No Charge, Others

AMI: acute myocardial infarction; CA: cardiac arrest



**Table S4. Baseline characteristics of AMI admissions with CA stratified by race.**

| Characteristic                                   |                                     | White<br>(N=136,698) | Black<br>(N=19,468) | Hispanic<br>(N=14,286) | Asian/Pacific Islander<br>(N= 5,163) | Native American<br>(N=890) | Other<br>(N=6,245) | <i>P</i> |
|--------------------------------------------------|-------------------------------------|----------------------|---------------------|------------------------|--------------------------------------|----------------------------|--------------------|----------|
| Age (years)                                      |                                     | 66.8 ± 12.9          | 63.9 ± 13.5         | 65.1 ± 13.2            | 66.4 ± 13.6                          | 62.3 ± 12.3                | 63.6 ± 13.7        | <0.001   |
| Female sex                                       |                                     | 31.6                 | 43.6                | 34.1                   | 30.6                                 | 30.8                       | 27.4               | <0.001   |
| Primary payer                                    | Medicare                            | 56.4                 | 53.4                | 48.8                   | 47.1                                 | 47.1                       | 41.6               | <0.001   |
|                                                  | Medicaid                            | 7.1                  | 15.0                | 15.5                   | 13.3                                 | 13.3                       | 16.1               |          |
|                                                  | Private                             | 27.7                 | 20.2                | 21.3                   | 30.7                                 | 26.9                       | 28.6               |          |
|                                                  | Others*                             | 8.8                  | 11.4                | 14.3                   | 8.9                                  | 12.8                       | 13.7               |          |
| Quartile of median household income for zip code | 0-25 <sup>th</sup>                  | 26.0                 | 53.0                | 40.8                   | 13.8                                 | 44.3                       | 26.2               | <0.001   |
|                                                  | 26 <sup>th</sup> -50 <sup>th</sup>  | 28.0                 | 22.3                | 24.7                   | 17.2                                 | 23.8                       | 22.0               |          |
|                                                  | 51 <sup>st</sup> -75 <sup>th</sup>  | 25.3                 | 15.1                | 22.2                   | 27.1                                 | 16.4                       | 24.9               |          |
|                                                  | 75 <sup>th</sup> -100 <sup>th</sup> | 20.7                 | 9.5                 | 12.3                   | 41.9                                 | 15.5                       | 26.9               |          |
| Charlson Comorbidity Index                       | 0-3                                 | 40.9                 | 39.3                | 39.2                   | 39.3                                 | 41.7                       | 46.2               | <0.001   |
|                                                  | 4-6                                 | 40.0                 | 36.5                | 38.3                   | 37.2                                 | 42.0                       | 38.6               |          |
|                                                  | ≥ 7                                 | 19.1                 | 24.2                | 22.5                   | 23.5                                 | 16.3                       | 15.2               |          |

|                                              |                           |      |      |      |      |      |      |        |
|----------------------------------------------|---------------------------|------|------|------|------|------|------|--------|
| <b>Hospital teaching status and location</b> | <b>Rural</b>              | 6.9  | 4.0  | 2.2  | 2.2  | 14.9 | 2.9  | <0.001 |
|                                              | <b>Urban non-teaching</b> | 32.2 | 22.5 | 34.8 | 31.7 | 28.3 | 28.9 |        |
|                                              | <b>Urban teaching</b>     | 60.9 | 73.5 | 63.0 | 66.0 | 56.7 | 68.3 |        |
| <b>Hospital bed-size</b>                     | <b>Small</b>              | 12.0 | 11.4 | 12.3 | 13.2 | 12.0 | 10.6 | <0.001 |
|                                              | <b>Medium</b>             | 28.5 | 29.9 | 30.4 | 27.3 | 25.5 | 25.4 |        |
|                                              | <b>Large</b>              | 59.4 | 58.7 | 57.3 | 59.5 | 62.5 | 64.0 |        |
| <b>Hospital region</b>                       | <b>Northeast</b>          | 17.6 | 13.9 | 12.0 | 14.8 | 4.5  | 28.3 | <0.001 |
|                                              | <b>Midwest</b>            | 23.4 | 19.8 | 6.9  | 8.8  | 23.6 | 13.9 |        |
|                                              | <b>South</b>              | 40.9 | 56.9 | 45.2 | 14.7 | 38.0 | 37.1 |        |
|                                              | <b>West</b>               | 18.1 | 9.4  | 35.9 | 61.8 | 33.9 | 20.7 |        |
| <b>AMI type</b>                              | <b>STEMI</b>              | 62.7 | 51.7 | 59.2 | 58.1 | 51.2 | 64.9 | <0.001 |
|                                              | <b>NSTEMI</b>             | 37.3 | 48.3 | 40.8 | 41.9 | 48.8 | 35.1 |        |
| <b>Atrial fibrillation or flutter</b>        |                           | 26.5 | 20.2 | 22.9 | 25.4 | 18.9 | 22.3 | <0.001 |
| <b>Cardiac rhythm</b>                        | <b>Shockable</b>          | 64.8 | 57.0 | 55.2 | 57.3 | 62.5 | 62.7 | <0.001 |
|                                              | <b>Non-shockable</b>      | 35.2 | 43.0 | 44.8 | 42.7 | 37.5 | 37.3 |        |

|                                         |                            |      |      |      |      |      |      |        |
|-----------------------------------------|----------------------------|------|------|------|------|------|------|--------|
| <b>Acute organ failure</b>              | <b>Multi-organ failure</b> | 55.1 | 62.3 | 62.7 | 65.8 | 63.4 | 62.3 | <0.001 |
|                                         | <b>Respiratory</b>         | 51.9 | 57.8 | 60.6 | 60.3 | 55.2 | 57.9 | <0.001 |
|                                         | <b>Hepatic</b>             | 10.3 | 13.2 | 11.9 | 15.0 | 12.0 | 13.8 | <0.001 |
|                                         | <b>Renal</b>               | 34.7 | 41.4 | 39.4 | 41.6 | 39.3 | 38.1 | <0.001 |
|                                         | <b>Hematologic</b>         | 9.9  | 12.5 | 12.0 | 17.5 | 10.3 | 14.5 | <0.001 |
|                                         | <b>Neurologic</b>          | 25.5 | 33.1 | 28.9 | 33.3 | 25.3 | 30.2 | <0.001 |
| <b>Cardiogenic shock</b>                |                            | 34.7 | 30.8 | 38.5 | 42.0 | 44.5 | 42.2 | <0.001 |
| <b>Pulmonary artery catheterization</b> |                            | 2.4  | 2.4  | 2.7  | 4.2  | 2.9  | 3.7  | <0.001 |
| <b>Invasive mechanical ventilation</b>  |                            | 50.1 | 59.0 | 60.8 | 62.7 | 56.1 | 56.3 | <0.001 |
| <b>Acute hemodialysis</b>               |                            | 1.4  | 2.0  | 2.3  | 3.0  | 3.4  | 2.4  | <0.001 |

Represented as percentage or mean  $\pm$  standard deviation; \*Self-Pay, No Charge, Others

AMI: acute myocardial infarction; CA: cardiac arrest; NSTEMI: non-ST-segment-elevation myocardial infarction; STEMI: ST-segment-elevation myocardial infarction

**Table S5. Clinical outcomes of AMI admissions with CA stratified by race.**

| <b>Characteristic</b>                     |                 | <b>White<br/>(N=136,698)</b> | <b>Black<br/>(N=19,468)</b> | <b>Hispanic<br/>(N=14,286)</b> | <b>Asian/Pacific Islander<br/>(N= 5,163)</b> | <b>Native American<br/>(N=890)</b> | <b>Other<br/>(N=6,245)</b> | <b><i>P</i></b> |
|-------------------------------------------|-----------------|------------------------------|-----------------------------|--------------------------------|----------------------------------------------|------------------------------------|----------------------------|-----------------|
| <b>In-hospital mortality</b>              |                 | 40.9                         | 47.4                        | 49.3                           | 48.7                                         | 45.2                               | 42.5                       | <0.001          |
| <b>Length of stay (days)</b>              |                 | 7.1 ± 9.2                    | 8.9 ± 13.3                  | 8.1 ± 11.5                     | 8.1 ± 10.2                                   | 7.2 ± 6.5                          | 8.7 ± 12.0                 | <0.001          |
| <b>Coronary angiography</b>               |                 | 73.1                         | 61.9                        | 69.8                           | 66.8                                         | 71.1                               | 73.8                       | <0.001          |
| <b>Early coronary angiography</b>         |                 | 52.8                         | 41.4                        | 50.1                           | 48.2                                         | 41.9                               | 53.2                       | <0.001          |
| <b>Mean time to angiography</b>           |                 | 3.0 ± 3.7                    | 3.4 ± 4.2                   | 3.2 ± 4.3                      | 2.8 ± 2.8                                    | 2.2 ± 1.7                          | 3.5 ± 3.9                  | <0.001          |
| <b>Percutaneous coronary intervention</b> |                 | 58.1                         | 44.6                        | 52.6                           | 47.8                                         | 59.7                               | 57.1                       | <0.001          |
| <b>Mechanical circulatory support</b>     |                 | 23.5                         | 19.4                        | 26.1                           | 27.6                                         | 25.7                               | 32.5                       | <0.001          |
| <b>Coronary artery bypass grafting</b>    |                 | 9.3                          | 7.3                         | 9.6                            | 12.4                                         | 8.0                                | 11.1                       | <0.001          |
| <b>Palliative care consultation</b>       |                 | 9.8                          | 10.5                        | 9.9                            | 10.2                                         | 8.2                                | 8.6                        | <0.001          |
| <b>Do-not-resuscitate status</b>          |                 | 15.6                         | 15.3                        | 18.8                           | 15.7                                         | 11.1                               | 14.2                       | <0.001          |
| <b>Hospitalization costs (x1000 USD)</b>  |                 | 146.8 ± 186.9                | 151.5 ± 183.1               | 197.9 ± 239.4                  | 203.6 ± 248.5                                | 142.3 ± 129.4                      | 205.7 ±                    | <0.001          |
| <b>Discharge disposition</b>              | <b>Home</b>     | 55.2                         | 47.3                        | 51.3                           | 48.6                                         | 61.3                               | 53.2                       | <0.001          |
|                                           | <b>Transfer</b> | 8.7                          | 10.0                        | 9.6                            | 14.9                                         | 9.4                                | 10.8                       |                 |

|  |                                 |      |      |      |      |      |      |
|--|---------------------------------|------|------|------|------|------|------|
|  | <b>Skilled nursing facility</b> | 23.1 | 28.3 | 23.3 | 21.8 | 19.1 | 24.1 |
|  | <b>Home with HHC</b>            | 12.2 | 13.5 | 14.6 | 14.5 | 10.2 | 11.5 |
|  | <b>Against medical advice</b>   | 0.8  | 0.9  | 1.2  | 0.2  | 0.0  | 0.4  |

Represented as percentage or mean  $\pm$  standard deviation

AMI: acute myocardial infarction; CA: cardiac arrest; HHC: home health care; USD: United States Dollars

**Table S6. Multivariable regression for in-hospital mortality in AMI-CA.**

| Total cohort<br>(N=182,750)                                 |                                        | Odds ratio         | 95% confidence interval |             | P      |
|-------------------------------------------------------------|----------------------------------------|--------------------|-------------------------|-------------|--------|
|                                                             |                                        |                    | Lower Limit             | Upper Limit |        |
| <b>Race</b>                                                 | <b>White</b>                           | Reference category |                         |             |        |
|                                                             | <b>Black</b>                           | 0.95               | 0.91                    | 0.99        | 0.008  |
|                                                             | <b>Hispanic</b>                        | 1.16               | 1.11                    | 1.21        | <0.001 |
|                                                             | <b>Asian/Pacific Islander</b>          | 1.11               | 1.03                    | 1.19        | 0.003  |
|                                                             | <b>Native American &amp; Other*</b>    | 1.03               | 0.97                    | 1.09        | 0.32   |
| <b>Age (years)</b>                                          | <b>&lt;75 years</b>                    | Reference category |                         |             |        |
|                                                             | <b>&gt;75 years</b>                    | 1.74               | 1.68                    | 1.79        | <0.001 |
| <b>Female sex</b>                                           |                                        | 1.13               | 1.10                    | 1.16        | <0.001 |
| <b>Primary payer</b>                                        | <b>Medicare</b>                        | Reference category |                         |             |        |
|                                                             | <b>Medicaid</b>                        | 0.67               | 0.65                    | 0.70        | <0.001 |
|                                                             | <b>Private</b>                         | 0.60               | 0.58                    | 0.62        | <0.001 |
|                                                             | <b>Others<sup>#</sup></b>              | 0.92               | 0.88                    | 0.96        | <0.001 |
| <b>Quartile of median household<br/>income for zip code</b> | <b>0-25<sup>th</sup></b>               | Reference category |                         |             |        |
|                                                             | <b>26<sup>th</sup>-50<sup>th</sup></b> | 0.92               | 0.90                    | 0.95        | <0.001 |
|                                                             | <b>51<sup>st</sup>-75<sup>th</sup></b> | 0.85               | 0.83                    | 0.88        | <0.001 |

|                                              |                                         |                    |       |       |        |
|----------------------------------------------|-----------------------------------------|--------------------|-------|-------|--------|
|                                              | <b>75<sup>th</sup>-100<sup>th</sup></b> | 0.83               | 0.80  | 0.86  | <0.001 |
| <b>Hospital teaching status and location</b> | <b>Rural</b>                            | Reference category |       |       |        |
|                                              | <b>Urban Non-Teaching</b>               | 1.04               | 0.99  | 1.09  | 0.16   |
|                                              | <b>Urban Teaching</b>                   | 1.16               | 1.10  | 1.22  | <0.001 |
| <b>Hospital bed-size</b>                     | <b>Small</b>                            | Reference category |       |       |        |
|                                              | <b>Medium</b>                           | 1.15               | 1.10  | 1.19  | <0.001 |
|                                              | <b>Large</b>                            | 1.15               | 1.11  | 1.20  | <0.001 |
| <b>Hospital region</b>                       | <b>Northeast</b>                        | Reference category |       |       |        |
|                                              | <b>Midwest</b>                          | 1.05               | 1.01  | 1.09  | 0.02   |
|                                              | <b>South</b>                            | 1.11               | 1.07  | 1.15  | <0.001 |
|                                              | <b>West</b>                             | 1.14               | 1.10  | 1.18  | <0.001 |
| <b>Charlson Comorbidity Index</b>            | <b>0-3</b>                              | Reference category |       |       |        |
|                                              | <b>4-6</b>                              | 1.20               | 1.17  | 1.24  | <0.001 |
|                                              | <b>≥ 7</b>                              | 1.42               | 1.37  | 1.47  | <0.001 |
| <b>Type of AMI</b>                           | <b>ST-segment elevation</b>             | Reference category |       |       |        |
|                                              | <b>Non-ST-segment elevation</b>         | 0.77               | 0.75  | 0.79  | <0.001 |
| <b>Multi-organ failure</b>                   |                                         | 1.515              | 1.472 | 1.560 | <0.001 |
| <b>Cardiogenic shock</b>                     |                                         | 1.630              | 1.585 | 1.676 | <0.001 |

|                                             |      |      |      |        |
|---------------------------------------------|------|------|------|--------|
| <b>Atrial fibrillation/flutter</b>          | 0.82 | 0.80 | 0.84 | <0.001 |
| <b>Ventricular tachycardia/fibrillation</b> | 0.36 | 0.35 | 0.36 | <0.001 |
| <b>Coronary angiography</b>                 | 0.42 | 0.41 | .44  | <0.001 |
| <b>Percutaneous coronary intervention</b>   | 0.37 | 0.36 | 0.38 | <0.001 |
| <b>Coronary artery bypass grafting</b>      | 0.23 | 0.22 | 0.24 | <0.001 |
| <b>Pulmonary artery catheterization</b>     | 0.97 | 0.91 | 1.04 | 0.43   |
| <b>Mechanical circulatory support</b>       | 1.79 | 1.74 | 1.84 | <0.001 |
| <b>Invasive mechanical ventilation</b>      | 1.37 | 1.34 | 1.41 | <0.001 |
| <b>Acute hemodialysis</b>                   | 1.13 | 1.03 | 1.23 | 0.01   |

\*Hispanic, Asian or Pacific Islander, Native American, Others; #Self-Pay, No Charge, Others

AMI: acute myocardial infarction; CA: cardiac arrest
